# Supplementary material for: Web: Net gain for Arab health?
Source: Royal Society of Chemistry journal article supplement (doi:10.1039/d2an01876d), 2006-10-21
Supplement: d2an01876d1.pdf [file d2an01876d1.pdf]

## Supporting Information

# Hybrid Plasmonic Nanoprobe Using Polyvinylpyrrolidone-Capped Bimetallic Silver-Gold Nanostars for Highly Sensitive and Reproducible Solution-based SERS Sensing

*Supriya Atta, <sup>a, b</sup> Tuan Vo-Dinh <sup>a, b, c \*</sup>*

<sup>a</sup> Fitzpatrick Institute for Photonics, <sup>b</sup> Department of Biomedical Engineering, <sup>c</sup> Department of Chemistry, Duke University, Durham, NC 27708, USA

### **Calculation for determination of the concentration of GNS-PVP, BGNS-Ag-PVP-1, BGNS-Ag-PVP-2, and BGNS-Ag-PVP-3.**

We first calculated the concentration of GNS-PVP according to the equation (1)-

$$C = \frac{M \text{ (number of moles of Au)}}{N \times 0.05(L)} \quad (1)$$

Where C is the concentration of the GNS-PVP (mol/L), M is the number of moles of gold present in GNS-PVP solution, and N is the number of gold atoms present in one nanostar. The GNS-PVP volume was 50 mL. The gold concentration was determined from ICP-MS measurement. The gold concentration was 200.6 µg/L for GNS-PVP. The number of gold atoms in a gold nanostar is determined from the nanostar volume and gold density. The volume was calculated according to the reported equation (2).<sup>1</sup>

$$V = \frac{4}{3}\pi a^3 + \sum_{t=1}^n \left\{ \frac{h_i}{3}\pi(R_i^2 + R_i^2 r_i + r_i^2) + \frac{2}{3}\pi r_i^3 - \frac{\pi}{6}(a - \sqrt{a^2 - R_i^2})[3R_i^2 + (a - \sqrt{a^2 - R_i^2})^2] \right\}$$

(2)

Where  $a$  is the radius of the spherical core of the GNS (25 nm),  $R_i$  is the base radius near the core of a spike (10nm),  $r_i$  is the radius of the hemispherical tip of a spike (2 nm), and  $h$  is the spike length measured from the base to tip of the spike (90 nm). The atomic density is 59 atoms per  $\text{nm}^3$ .<sup>1</sup> The volume of the GNS-PVP was calculated to be 289580.416  $\text{nm}^3$ . The concentration of the GNS-PVP was calculated to be 3.5 pmol/L. For our SERS study, GNS-PVP was concentrated 2.5 times, and the final concentration of GNS-PVP was 8.75 pmol/L. The concentration of BGNS-Ag-PVP-1, BGNS-Ag-PVP-2, and BGNS-Ag-PVP-3 was calculated by following the previous calculation method. The gold concentration was 202.8, 205.4, and 200.5  $\mu\text{g/L}$  for BGNS-Ag-PVP-1, BGNS-Ag-PVP-2, and BGNS-Ag-PVP-3, respectively. The concentration of the BGNS-Ag-PVP-1, BGNS-Ag-PVP-2, and BGNS-Ag-PVP-3 was calculated to be 3.53, 3.58, and 3.49 pmol/L, respectively. The final concentration of the BGNS-Ag-PVP-1, BGNS-Ag-PVP-2, and BGNS-Ag-PVP-3 was concentrated and adjusted to 8.75 pmol/L.

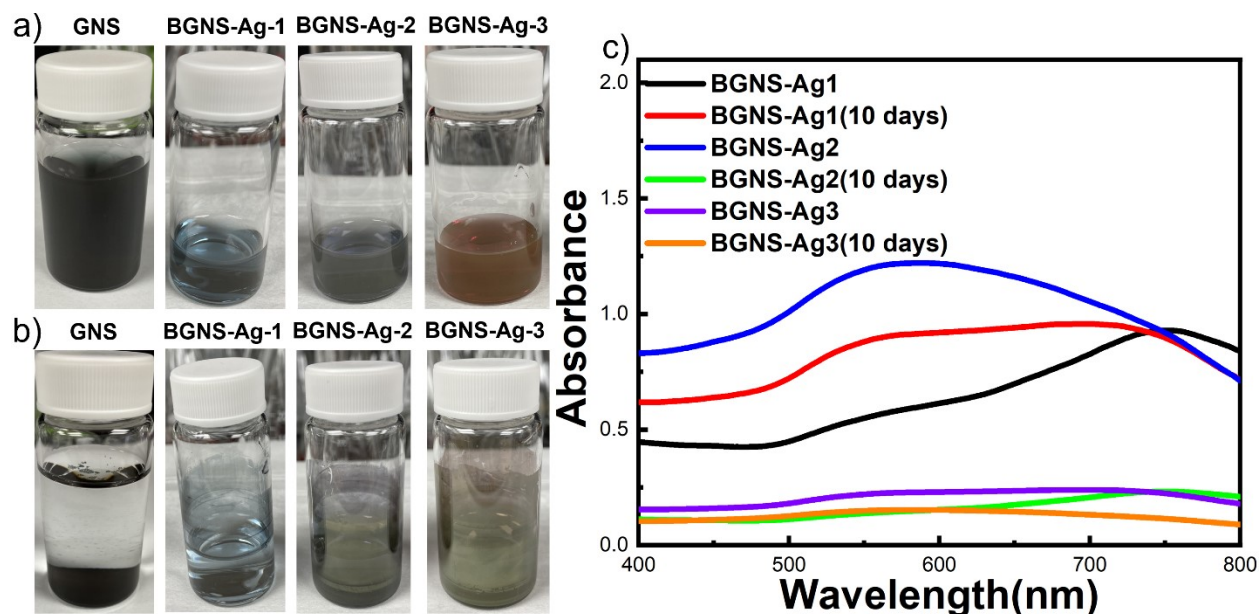

**Figure S1.** Images of GNS, BGNS-Ag-1, BGNS-Ag-2, and BGNS-Ag-3 after 0 days of synthesis (a), and after 10 days of synthesis (b) indicating aggregation of nanoparticles. UV-vis absorbance spectra of GNS, BGNS-Ag-1, BGNS-Ag-2, and BGNS-Ag-3 after 0 days of synthesis, and after 10 days of synthesis (c).

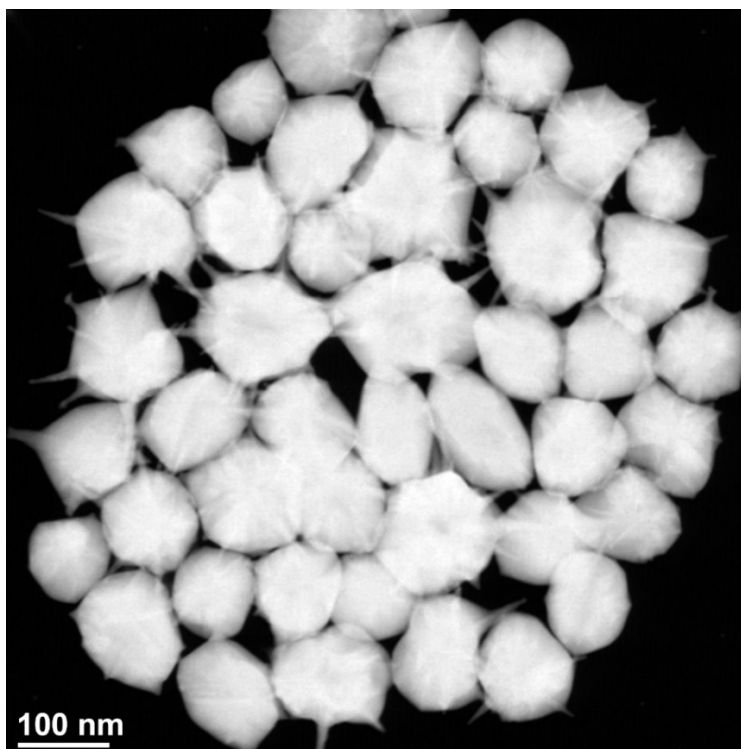

**Figure S2.** STEM image of BGNS-Ag-PVP-3 after 90 days of synthesis.

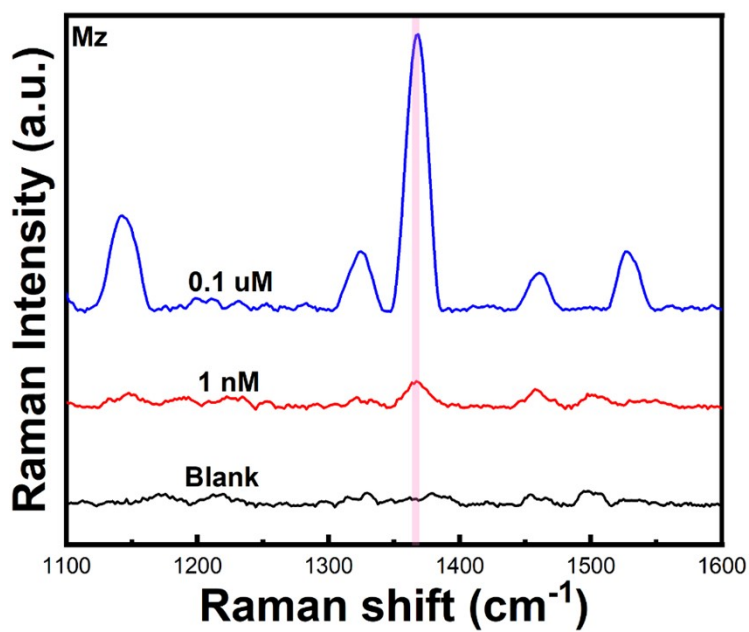

**Figure S3.** The SERS spectra of Mz at 0.1 uM and 1 nM concentration.

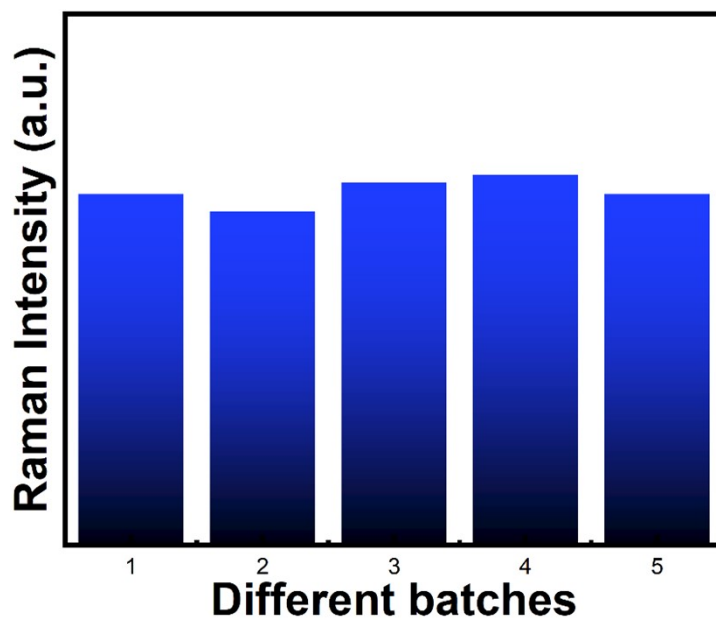

**Figure S4.** The Raman band intensity of Mz is at  $1365\text{ cm}^{-1}$  of five different batches of BGNS-Ag-PVP-3.

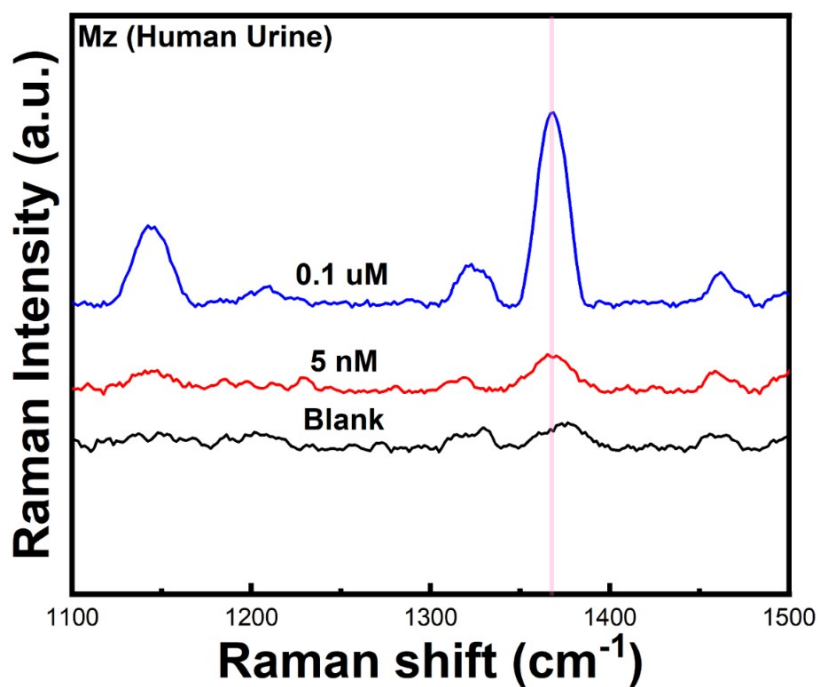

**Figure S5.** The SERS spectra of Mz at 0.1 uM and 5 nM concentration where Mz is spiked with human urine.

## Reference-

1. Tsoulos, T. V.; Han, L.; Weir, J.; Xin, H. L.; Fabris, L., A closer look at the physical and optical properties of gold nanostars: an experimental and computational study. *Nanoscale* **2017**, *9* (11), 3766-3773.
